# Supplementary material
Source: PubMed Central journal article supplement (PMC556409)

### Supplemental Figure 1 Legend.

Supplemental Figure 1. Requirements for suppression of *rsc2* Ts<sup>-</sup> alleles by N-Set1. (A) Suppression of *rsc2* Ts<sup>-</sup> alleles by N-Set1 requires an intact SET1/COMPASS complex. Strains *rsc2* V457M (YBC1111), *rsc2* V457M *set1*Δ (YBC1375), *rsc2* V457M *set1*Δ *bre2*Δ (YBC1690), and *rsc2* V457M *set1*Δ *spp1*Δ (YBC1689) transformed with N-Set1 (p1102), or empty vector (p525) and WT (YBC1231 (p525)) were grown on media lacking uracil at 30°C and 33°C (B) Suppression of *rsc2* Ts<sup>-</sup> alleles requires Rad6 function. Strains *rsc2* V457M (YBC1111), *rad6*Δ (YBC1671), *rsc2* V457M *rad6*Δ (YBC1672), *rsc2* D461G (YBC1112), and *rsc2* D461G *rad6*Δ (YBC1673) were transformed with pM2L.N-Set1 (p1059) and WT (YBC1231 (p525)) were grown on media lacking uracil at 30°C and 33°C.

**A**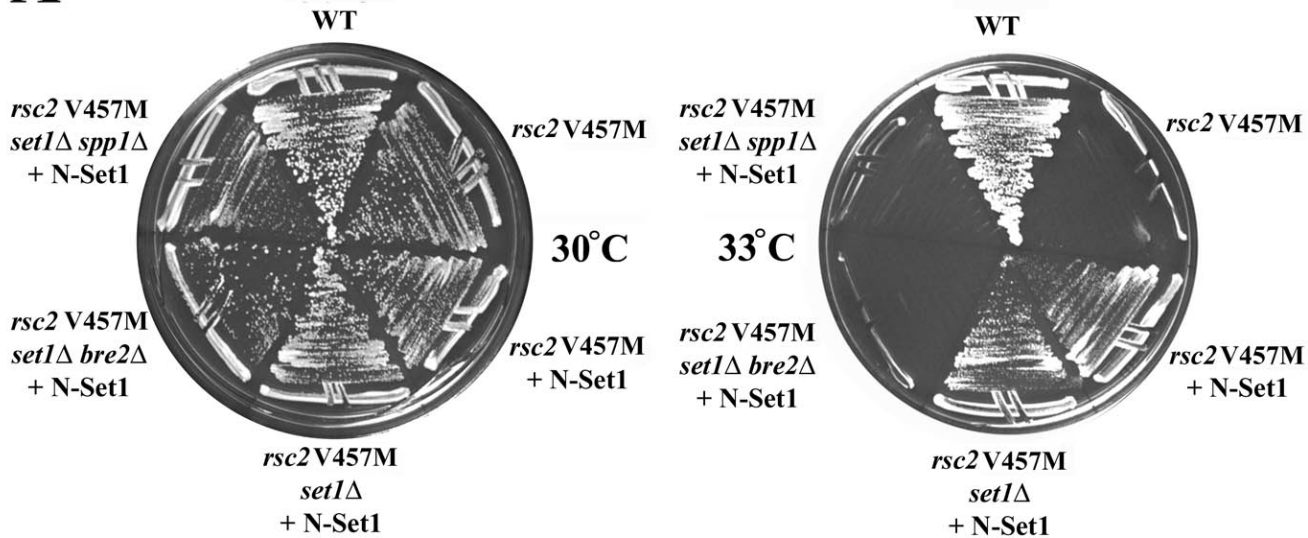**B**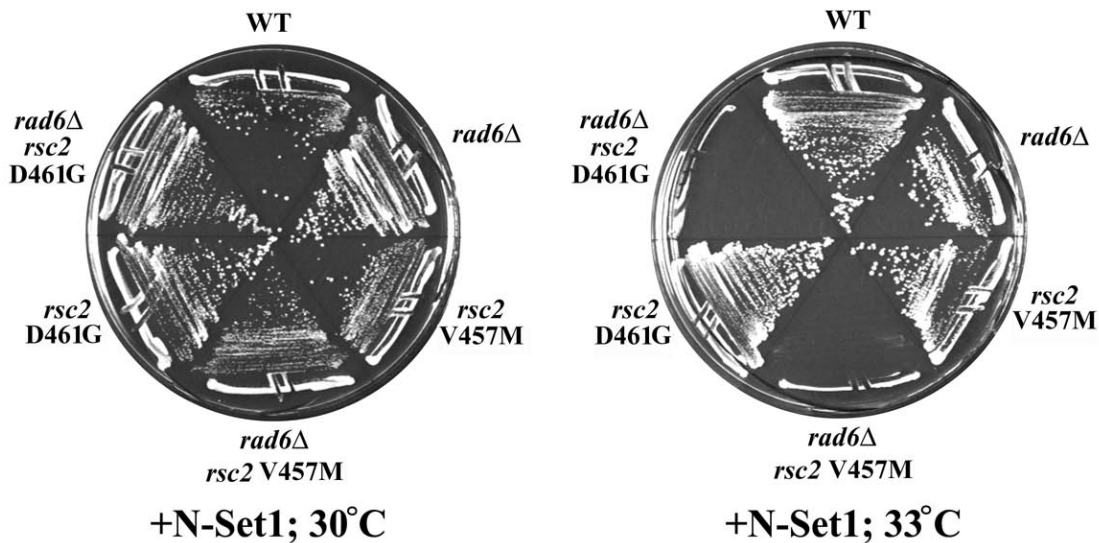

Supplement: 7600607s1.pdf [file 7600607s1.pdf]
