# Supplementary material
Source: PubMed Central journal article supplement (PMC556409)

### **Supplemental Figure 2 Materials and Methods**

Protein A immunoprecipitations (100  $\mu$ l) containing 600  $\mu$ g of whole cell extract, 25  $\mu$ l of IgG sepharose (Amersham), and IP buffer (50 mM Tris pH 7.5, 1 mM EDTA, 10% glycerol, 0.05% Tween 20, 150 mM NaCl, protease inhibitor cocktail), were rotated at 4°C for 4 hours. Precipitates were recovered, washed three times with IP buffer containing 250 mM NaCl, and eluted with 30  $\mu$ l of 4X SDS sample buffer.

### **Supplemental Figure 2 Legend.**

Supplemental Figure 2. Set1 derivatives bearing RRM mutations are assembled into the COMPASS complex. SET1/COMPASS complex from YBC1720 (*set1 $\Delta$  BRE2.TAP*) transformed with WT Set1 (p1067),  $\Delta$ RRM (p1377), Set1 VYL295-297AAA, A293T (p1375), and Set1 VYL295-297DDD (p1376), or YBC1236 (*set1 $\Delta$* , untagged, p1067) was immunoprecipitated from whole cell extract with IgG sepharose. Immune precipitates were eluted with SDS sample buffer, and half of the eluate was loaded onto a 7.5% acrylamide SDS-PAGE gel, transferred to PVDF, and probed for Set1 protein with anti-Flag antibody.

## Bre2-TAP eluates

---

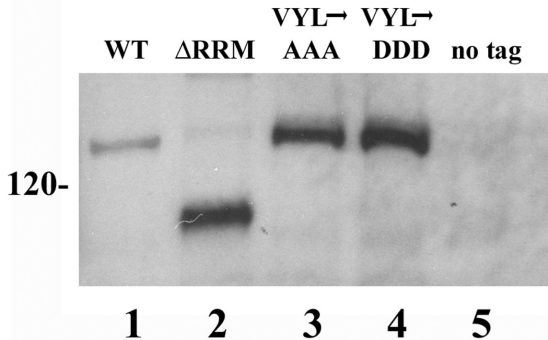

Supplement: 7600607s2.pdf [file 7600607s2.pdf]
