# Supplementary material
Source: PubMed Central journal article supplement (PMC556409)
Supplement: 7600607s3.pdf [file 7600607s3.pdf]

**Supplemental Table S1. Yeast Strains**

| <b>Strain</b> | <b>Mating Type</b>              | <b>Genotype</b>                                                                                                                                                                                                                                                                | <b>Source</b>     |
|---------------|---------------------------------|--------------------------------------------------------------------------------------------------------------------------------------------------------------------------------------------------------------------------------------------------------------------------------|-------------------|
| YBC63         | <i>MAT<math>\alpha</math></i>   | <i>his3<math>\Delta</math>200 leu2<math>\Delta</math>1 lys2-128<math>\delta</math> trp1<math>\Delta</math>63 ura3-52</i>                                                                                                                                                       | This work         |
| YBC76         | <i>MAT<math>\alpha</math>/a</i> | <i>his3<math>\Delta</math>200/his3<math>\Delta</math>200 leu2<math>\Delta</math>1/leu2<math>\Delta</math>1 lys2-128<math>\delta</math>/lys2-128<math>\delta</math> trp1<math>\Delta</math>63/trp1<math>\Delta</math>63 ura3-52/ura3-52</i>                                     | This work         |
| YBC1111       | <i>MAT<math>\alpha</math></i>   | <i>his3<math>\Delta</math>200 leu2<math>\Delta</math>1 lys2<math>\Delta</math>0 trp1<math>\Delta</math>63 ura3-52 rsc1<math>\Delta</math>::HIS3 rsc2<math>\Delta</math>::LEU2 [p314.rsc2.V457M]</i>                                                                            | This work         |
| YBC1112       | <i>MAT<math>\alpha</math></i>   | <i>his3<math>\Delta</math>200 leu2<math>\Delta</math>1 lys2<math>\Delta</math>0 trp1<math>\Delta</math>63 ura3-52 rsc1<math>\Delta</math>::HIS3 rsc2<math>\Delta</math>::LEU2 [p314.rsc2.D461G]</i>                                                                            | This work         |
| YBC1231       | <i>MAT<math>\alpha</math></i>   | <i>his3<math>\Delta</math>200 leu2<math>\Delta</math>1 lys2<math>\Delta</math>0 trp1<math>\Delta</math>63 ura3-52 rsc1<math>\Delta</math>::HIS3 rsc2<math>\Delta</math>::LEU2 [p314.RSC2]</i>                                                                                  | This work         |
| YBC1236       | <i>MAT<math>\alpha</math></i>   | <i>his3<math>\Delta</math>200 leu2<math>\Delta</math>1 lys2-128<math>\delta</math> trp1<math>\Delta</math>63 ura3-52 set1<math>\Delta</math>::HIS3MX6</i>                                                                                                                      | This work         |
| YBC1366       | <i>MAT<math>\alpha</math></i>   | <i>his3<math>\Delta</math>1 leu2<math>\Delta</math>0 lys2<math>\Delta</math>0 ura3<math>\Delta</math>0 bre2<math>\Delta</math>::Kanmx</i>                                                                                                                                      | Research Genetics |
| YBC1367       | <i>MAT<math>\alpha</math></i>   | <i>his3<math>\Delta</math>1 leu2<math>\Delta</math>0 lys2<math>\Delta</math>0 ura3<math>\Delta</math>0 spp1<math>\Delta</math>::Kanmx</i>                                                                                                                                      | Research Genetics |
| YBC1375       | <i>MAT<math>\alpha</math></i>   | <i>his3<math>\Delta</math>200 leu2<math>\Delta</math> lys2<math>\Delta</math> trp1<math>\Delta</math>63 ura3<math>\Delta</math> rsc1<math>\Delta</math>::LEU2 rsc2<math>\Delta</math>::LEU2 set1<math>\Delta</math>::HIS3MX6 [p314.rsc2.V457M]</i>                             | This work         |
| YBC1539       | <i>MAT<math>\alpha</math></i>   | <i>his3<math>\Delta</math>1 leu2<math>\Delta</math>0 lys2<math>\Delta</math>0 ura3<math>\Delta</math>0 rad6<math>\Delta</math>::Kanmx</i>                                                                                                                                      | Research Genetics |
| YBC1671       | <i>MAT<math>\alpha</math></i>   | <i>leu2 lys2<math>\Delta</math> ura3<math>\Delta</math> his3<math>\Delta</math> trp1<math>\Delta</math>63 rsc1<math>\Delta</math>::HIS3 rsc2<math>\Delta</math>::HIS3 rad6<math>\Delta</math>::kanmx [p314.RSC2] [pM2L.N-SET1]</i>                                             | This work         |
| YBC1672       | <i>MAT<math>\alpha</math></i>   | <i>leu2 lys2<math>\Delta</math> ura3<math>\Delta</math> his3<math>\Delta</math> trp1<math>\Delta</math>63 rsc1<math>\Delta</math>::HIS3 rsc2<math>\Delta</math>::HIS3 rad6<math>\Delta</math>::kanmx [p314.rsc2.V457M][pM2L.N-SET1]</i>                                        | This work         |
| YBC1673       | <i>MAT<math>\alpha</math></i>   | <i>leu2 lys2<math>\Delta</math> ura3<math>\Delta</math> his3<math>\Delta</math> trp1<math>\Delta</math>63 rsc1<math>\Delta</math>::HIS3 rsc2<math>\Delta</math>::HIS3 rad6<math>\Delta</math>::kanmx [p314.rsc2.D461G][pM2L.N-SET1]</i>                                        | This work         |
| YBC1689       | <i>MAT<math>\alpha</math></i>   | <i>his3<math>\Delta</math> leu2<math>\Delta</math> lys2<math>\Delta</math> trp1<math>\Delta</math>63 ura3<math>\Delta</math> rsc1<math>\Delta</math>::LEU2 rsc2<math>\Delta</math>::LEU2 set1<math>\Delta</math>::HIS3MX6 spp1<math>\Delta</math>::kanmx [p314.rsc2.V457M]</i> | This work         |
| YBC1690       | <i>MAT<math>\alpha</math></i>   | <i>his3<math>\Delta</math> leu2<math>\Delta</math> lys2<math>\Delta</math> trp1<math>\Delta</math>63 ura3<math>\Delta</math> rsc1<math>\Delta</math>::LEU2 rsc2<math>\Delta</math>::LEU2 set1<math>\Delta</math>::HIS3MX6 bre2<math>\Delta</math>::kanmx [p314.rsc2.V457M]</i> | This work         |
| YBC1720       | <i>MAT<math>\alpha</math></i>   | <i>his3<math>\Delta</math> leu2<math>\Delta</math> lys2<math>\Delta</math> trp1<math>\Delta</math>63 ura3<math>\Delta</math> pep4<math>\Delta</math>::kanmx set1<math>\Delta</math>::HIS3MX6 BRE2.TAP::TRP1</i>                                                                | This work         |
| YBC2259       | <i>MAT<math>\alpha</math></i>   | <i>his3<math>\Delta</math>1 leu2<math>\Delta</math>0 met15<math>\Delta</math>0 ura3<math>\Delta</math>0 rtf1<math>\Delta</math>::Kanmx</i>                                                                                                                                     | Research Genetics |
| GHY878        | <i>MAT<math>\alpha</math></i>   | <i>his3<math>\Delta</math>200 leu2<math>\Delta</math>0 lys2-128<math>\delta</math> ura3<math>\Delta</math>0 paf1<math>\Delta</math>::LEU2</i>                                                                                                                                  | Grant Hartzog     |
